# Supplementary material for: Altered brain dynamics index levels of arousal in complete locked-in syndrome
Source: Springer Nature journal article supplement (doi:10.1038/s42003-023-05109-1), 2023-07-20
Supplement: 42003_2023_5109_MOESM2_ESM.pdf [file 42003_2023_5109_MOESM2_ESM.pdf]

## Description of Additional Supplementary Files

**File name:** Supplementary Data 1

**Description:** Numerical source data used to generate the plots in the figures. Each excel sheet corresponds to the data used for a plot of the figures (e.g., 2a, 2b, 2c, etc.).
